# Supplementary material for: Expression, Functional Characterization, and Preliminary Crystallization of the Cochaperone Prefoldin from the Thermophilic Fungus Chaetomium thermophilum
Source: PubMed Central journal article supplement (PMC6121465; doi:10.3390/ijms19082452), 2018-08-19
Supplement: ijms-19-02452-s001.pdf [file ijms-19-02452-s001.pdf]

**Supplementary Fig. S1 Nucleotide and amino acid sequences of CtPFD subunits.**

CtPFD1

121 a.a. MW=13423.81

ATGTCACTAAGCACAGAGGCGCTACAAAAGCTTGTGCGGGAGATTGAGTCCCAGGCGATTGCGGCACAGCAGCAGATCAGCCTGGTGAGG  
M S L S T E A L Q K L V R E I E S Q A I A A Q Q Q I S L V R

ACACAAATCGCAGCCAAGCAGCGGGAGATGCGGCTGGCGCAGTTGACGCGCAGCGAAATCTCCGACTGCCAGCGATACGGACGTATAT  
T Q I A A K Q R E M R L A Q L T R S E I S A L P S D T D V Y

GAAGTGTTGGGAAGATGTTCTGTTGGCGGTGCCGGTCCGGGATGCAGGATAAGCTGGGGAGCAGATCAAGACTCTAGAGGGCGAGGTG  
E G V G K M F V A V P V P A M Q D K L G E Q I K T L E G E V

GAGACGATGAACAAGAGGCTGCACTACCTGGAGACAACCTGCGAAGAACAGCCAGGAGCACATCGAGAAGATTATCAAGGGCGGTGGTCAG  
E T M N K R L H Y L E T T A K N S Q E H I E K I I K G G G Q

TCATAA

S \*

CtPFD2

117 a.a. MW=13449.85

ATGGCGACACAGTCTGCAGCAGCAAAGAGGCAGCAAGACCTCCAGCTGCAGTATACCACTTATAAGAACACCCTGCAGCAAATTGCCAG  
M A T Q S A A A K R Q Q D L Q L Q Y T T Y K N T L Q Q I A Q

AAGATTGGAGATGTCGAGCAGGAGGCTGAGGAGCACAAGCTTGTCTTGGAGACTTTGGAGCCTCTCCAGGTGACCGCAAATGCTTCCGT  
K I G D V E Q E A E E H K L V L E T L E P L P G D R K C F R

ATGATCAATGGCGTCTTGGTGGAAAGAACCGTCCAGGATGTGATTCTGCTCTTCGGACCAACGCTGAAGGGCTGAAGAAGTCTCGAA  
M I N G V L V E R T V Q D V I P A L R T N A E G L K K V L E

GATCTTGTAACAATAACAAGCGAAACAGGATGAACCTTGAGCAGTGGAGAAGAAAAACAACGTTCCAGGTCGTGCAGTCATGA  
D L V K Q Y K A K Q D E L E Q W K K K N N V Q V V Q S \*

CtPFD3

180 a.a. MW=20558.89

ATGGCCAGTCAAGCAAAAGAAGCGGCGACAAAGGACGCTACCCCTCGAACCCCGCGGATTCCCTATGCGCCGTTCTGTCGACAAGGTC  
M A S Q A K E A A T K D A T P S N P R G I P Y A P F V D K V

GAGGACTATGTGTCGTACGGGACGATGTGAGCCGACGCTGCGGCGATTCCAAGAGCTGATCGCGAAGTATCAGTTTCATGGAGCAGAAC  
E D Y V S S R D D V E P T L R R F Q E L I A K Y Q F M E Q N

CTGCAGCGGAGGGTAGCCGGTCTGAAGGATAAGATGCCCGACATCCAAAAGACCTTGATACGGTTCGGTCTTGAAGCTCAGGACGTCC  
L Q R R V A G L K D K M P D I Q K T L D T V R F L K L R T S

GAGTCGATCCGATCGAGACAACCTTTGAGCTGAACGACACGCTCTATGCGAAGGCCGAGATCCCGCCGACGGACGAGGTCTATCTCTGG  
E S D P I E T T F E L N D T L Y A K A E I P P T D E V Y L W

CTTGGTGCCAACGTCATGCTAGCGTATCCTCTCGACGAAGCAGAGCAGCTCCTGGATTGAAACTCAAGGGCGCAAAGCAGAGTCTGGCT  
L G A N V M L A Y P L D E A E Q L L D S K L K A A K Q S L A

AACTGCGAGGAGGACCTGGACTTTCTGCGGAGCAGATCACGACCATGGAGGTCGCCATCGCGAGAGTGACAACCTGGGACGTCAGCTCA  
N C E E D L D F L R E Q I T T M E V A I A R V Y N W D V S S

TAA

\*

CtPFD4

134 a.a. MW=15645.89

ATGAACATAAGTCGGCGAATGGAGGAGGAGGAGGCTATAGCGAGGATGTCGAGGTACGCCGAGGACCAGGACAAGATCAACAGGTTCC  
M N I S R R M E E E E A I G E D V E V R R E D Q D K I N R F  
AGCCGTCTGCATGGCCACGAATTGGCGATTGAGGAGGAGCTGAAGGCCAAGCAGAAGGAGAAGGAAGAGTTGGACGATATCACAAACGGAG  
S R L H G H E L A I E E E L K A K Q K E K E E L D D I T T E  
TTGGAGCTTGCCGACGAAGACGAGCTTGCCATACAAAGTCGGCGACGCATTCTTCCACATTCCCCTCCCCAAGCCCAAGAGATGCTC  
L E L A D E D E L V P Y K V G D A F F H I P L P Q A Q E M L  
GGTATTTTCGACGGCGAAGCTCGAGGAGGAAATCTCACAACCTGAGGAGAAGCTGAGCAATATCCGCGATGAGATGTCACAACCTAAAGGTG  
G I S T A K L E E E I S Q L E E K L S N I R D E M S Q L K V  
GAGTTGTACGCAAGATTTGGCAAGACCATCAATCTCGAGACATGA  
E L Y A R F G K T I N L E T \*

CtPFD5

165 a.a. MW=17724.67

ATGGCCAGCCGAGCGGTCAAGATAAACAAAGGACAAGGAGAGGAGGAGTTCGATCTTGCATCCCTCAGCGTACAACAACCTCAGTACAGTGAAG  
M A S R S G Q D K Q G Q G E A V D L A S L S V Q Q L S T V K  
AAGCAGCTTGACGGAGAAGTCGAGCACCTATCAACGTCGTACGCGCAGTTGGTGGCCGCTCAGGGGAAGTTTAAAGAATGTCTACGCATT  
K Q L D G E V E H L S T S Y A Q L V A A Q G K F K E C L R I  
GTCAAGGACAGAGCATCAACGCTTGAGAAGGATAAAACCGTTCTCGTTCCCCTTACCAACTCCCTCTACGTCAAGGGAAGCTGTCCGAC  
V K D R A S T L E K D K T V L V P L T N S L Y V K G K L S D  
CCGGAACACGTGCTCGTTGATGTCGGAACGGGCTTCTACGTGAAAAGGACACGACCAGCGCAGCTGAATTTTACGAAGCAAGATCAAG  
P E H V L V D V G T G F Y V E K D T T S A A E F Y E G K I K  
GAGCTAGCGACCAATATCCAGGGACTGGAGGGCATTGTGCAGGCAAAAACAGCAAATCTCCGAGTTGTGGAAGAAGTCCTTCGGCAAAA  
E L A T N I Q G L E G I V Q A K T A N L R V V E E V L R Q K  
GTACTCGCTTCAAACGCTGCTGGAACGGGAGCAAAGCAATCTTCATGA  
V L A S N A A G T G A K Q S S \*

CtPFD6

124 a.a. MW=14013.59

ATGGCTGAAATCCAGGCCCGCCTTCAAGCCCTCTCTGAGGAGTTTCAGCAAGCTCCAACAAGATCTCCAAGATGCTCTGCAATCAAGACAG  
M A E I Q A R L Q A L S E E F S K L Q Q D L Q D A L Q S R Q  
AAGCTCGAGGCGCAGAAGCAAGAAAACCTTGGGGTCCAAAAGGAGTTCAAGAAGCTCAAGGAGGGCGAAAACATCTACAAACTGATCGGC  
K L E A Q K Q E N L G V Q K E F K K L K E G E N I Y K L I G  
CCTGTTCTTCTCAAGCAAGACAAGGTTGATGCAGAGAGCATAGTCAATGGTCTAGACTTTATTGACAAGGAAATCAACCGAATAGAA  
P V L L K Q D K V D A E S I V N G R L D F I D K E I N R I E  
ACTCTCATCAAGGAACTCCAGGGCAAGATCGAGAAAAAGAAAGGGGAGATTATCCAGGTGCAAAGTGGTTTGAAGCAGCGGCAGTTCAA  
T L I K E L Q G K I E K K K G E I I Q V Q S G L Q A A A V Q  
GCCGTCAAGGCATGA  
A V K A \*

## Supplementary Fig. S2 Amino acid sequence alignments of Prefoldin subunits

CtPFD1      MSLS-TEALQKLVREIESQAIAAQQQISLVRTQIAAKQREMRLAQLTRSEISALPSDTDV  
 ScPFD1      -----MSQIAQEMTVSLRNARTQLDMVNQQLAYLDRQEKLAELTKKELESYPTD-KV  
 HsPFD1      MAAPVDLELKKAFTELQAKVIDTQQKVKLADIQIEQLNRTKKHAHLTDTEIMTLVDETMM  
 EnPFD1      MSIP-NEALQKLLQEIESRVITSQQQIGITKAQMTSKNRDIRMLELTSKELSSLPADTNV  
                   : . :      \* :                    : :    : :    : .      \* :            : \*    :    . \* \*    . \* :    :            :    : . :

CtPFD1      YEGVGKMFVAVPVPAMQDKLGEQIKTLEGEVETMNKRLHYLETTAKNSQEHIEKIIKGGG  
 ScPFD1      WRSCGKSFILQDKSKYVNDLSHDETVLLDQRKTLKIKKNYLETTVEKTIDNLKALMKN--  
 HsPFD1      YEGVGRMFILQSKEAIHSOLLEKQKIAEEKIKELEQKKSYLERSVKEAEDNIREMLMARR  
 EnPFD1      YEGVGKMFVAVPRATVDKRISTETGELKGEIENLEKRMNYLEMFTFKNSRENLEAILKSGR  
                   : . .    \* :    \* :                    . :    .                    : :    : :    :      \* \* \*    :    : : :    : : : .    : :

CtPFD1      QS  
 ScPFD1      --  
 HsPFD1      --  
 EnPFD1      A-

**Ct: *Chaetomium thermophilum***  
**Sc: *Saccharomyces cerevisiae***  
**Hs: *Homo sapiens***  
**En: *Emericella nidulans***

CtPFD2 -----MATQSAAAKRQODLQLQYTTYKNTLQQIAQKIGDVEQEAEHKLVLLET  
 ScPFD2 -----MEQRNNVFQAKYNEYKQILEELQTKIIELGHDKDEHTIVIKT  
 HsPFD2 MAENSGRAGKSSGSGAGKGAVSAEQVIAGFNRLRQEQRLASKAAELEMELNEHSLVIDT  
 EnPFD2 -----MASQPQIAPKKQQELQAQYTNFKNTLQQLAQKIGDIEQEAEHKLVIDT

: . :. :: . : \* :: : : \*\* . : \* : . \*

CtPFD2 LEPLPGDRKCFRMINGVLVERTVQDVIPALRTNAEGLKKVLEDLVKQYKAKQDELEQWKK  
 ScPFD2 LKDAEPTRKCYRMIGGALVESDVQTSLEPKKENIEGTISKMKETLIQTAKFEKWKK  
 HsPFD2 LKEVDETRKCYRMVGGVLVERTVKEVLPALENNKEQIQKIIEITLQQLQAKGKELNEFRE  
 EnPFD2 LEPLPQDRTCFRMVNGVLVERTVADVLP TLKTN SDGLKQVLEDMLKQYKSKQSELDNWKK

\* : \* . \* : \*\* : . \* . \*\*\* \* : \* \* . . : : : : . . : : . \* : : : : : :

CtPFD2 KNNVQVVQS  
 ScPFD2 DNKIQVVKV  
 HsPFD2 -----  
 EnPFD2 KNNIQVVQP

CtPFD3 MA-----SQAKEAATKDATPSNPRGIPYAPFVDKVEDYVSSRDD--VEPTLRRFQELIAKY  
 ScPFD3 -----MDTLFNSTENKARGIPQAPFIENVNEIIKDPD--FELCFNKFQERLSKY  
 HsPFD3 MAAVKDSCGKGEMATGNRRLHLGIPEAVFVEDVDSFMKQPGNETADTVLKKLDEQYQKY  
 EnPFD3 -----MADKKPSDPTQTNPRGIPVAPFVDNVSDYVSSRAD--VEPTMRSFQEMISKY

. \*\*\* \* \* : : . \* . . : . . : : : . : : \* \*\*

CtPFD3 QFMEQNLQRRVAGLKDKMPDIQKTLDTVRFLKLRT----SESDPIETTFELNDTLYAKAE  
 ScPFD3 KFMQESKLATIKQLKTRIPDLENTLKICQSLRNHSDEGDESDEPILLHYQLNDTLYTKAQ  
 HsPFD3 KFMELNLAQKKRRLKGQIPEIKQTLLEILKYMQKKK----ESTNSMETRFLADNLYCKAS  
 EnPFD3 QFMEVNTSRRAGLREKIPDIKKTLEMVTFKARKE--SSSATPLETNFELNDTLYARAT

: \*\* : . \* : : : \* : : : \* \* . : : : . . : : \* \* . \* \* : \*

CtPFD3 IPP-----TDEVYLWLGANVMLAYPLDEAEQLLDSKLKAAKQSLANCEEDLDFLREQITT  
 ScPFD3 VDIPEDRADLKVGLWLGADVMEYPIDEAIELLKKKLADSEQSLTVSTEDVEFLRENITT  
 HsPFD3 VPP-----TDKMCLWLGANVMLEYDIDEAQALLEKNLSTATKNLDSLEEDLDFLRDQFTT  
 EnPFD3 VDDPAH---TEEVYLWLGANVMLAYPIAEQAAMLEDKLAAAEQSLANCDEDLEFLREQITT

: : : \* \* \* \* \* : \* \* \* \* \* \* : \* \* : \* . . : \* : : . \* \* \* : : \* \* \* \* \* : : \* \*

CtPFD3 MEVAIARVYNWDVSS-----  
 ScPFD3 MEVNCARLYNWDVQRRQDLKQAQEGTKNLKI  
 HsPFD3 TEVNMARVYNWDVKRRNKDDSTKNKA-----  
 EnPFD3 LEVATARVYNWDVVQRRKERAEGKEETS---

\*\* \*\* : \* \* \* \* \*

CtPFD4 ----MNISRMEEEEAI GEDVEVRREDQDKINRFSRLHGHELAI EEELKAKQKEKEELDD  
 ScPFD4 -----MELLPOGQRNNTQVTFEDQOKINEFSKLIMRKDAIAQELSLQREEKEYLDD  
 HsPFD4 -----MAATMKKAAAEDVNVTFEDQOKINKFARNTSRITELKEEIEVKKKQLQNLED  
 EnPFD4 MMNHRMLSKEDEAAIGNSEDTEVRREDQEKINRFSRLHQRETVLEEKLKKGKQKDKEDLEE  
 . : : . : \* \*\* : \*\* \* . \* : : : : : : : : : : : \* : :

CtPFD4 ITTELELADEDE-LVPYKVGDAFFHIPLPQAQEMLGISTAKLEEEISQLEEKLSNIRDEM  
 ScPFD4 VSLEIELIDEDE-PVQYKVGDLFIFMKQSKVTAQLEKDAERLDNKIETLEDKQRDIDSRL  
 HsPFD4 ACDDIMLADDDCLMIPYQIGDVFI SHSQEETQEMLEEAKKNLQEEIDALESRVESIQRVL  
 EnPFD4 ISTELELADEDE-LIPYKIGDSFVHLPLEEAQTLLASSTEQIDSEVAKLEETLSDLRDEM  
 : : \* \* : \* : \* : : \* \* \* . : . \* . : : : : : \* \* . . : :

CtPFD4 SQLKVELYARFGKTINLET---  
 ScPFD4 DALKAILYAKFGDNINLER---  
 HsPFD4 ADLKVQLYAKFGSNINLEADES  
 EnPFD4 QQLKVALYARFGRSINLET---  
 \*\* . \*\* \* : \*\* . \*\*\*\*\*

CtPFD5 --MASRSGQDKQGQGEAVDLASLSVQQLSTVKKQLDGEVEHLSTSYAQLVAAQGKFK---  
 ScPFD5 -----MSSQKIDLTKLNPEQLNAVKKQDFDQELQHFQSLQALQALMAKGFQFT---  
 HsPFD5 -----MAQSINITELNLPQLEMLKNQLDQEVFLSTSYAQLKVVQTKYVEAK  
 EnPFD5 MPPQNTPASDSDAPPGAVNISSLSTPQLRALQTRLSTELEHLTSSHAKLRAAQSRFR---  
 ::::.\* \*\* :: ::. \*::: \* \* .: ::

CtPFD5 ECLRIVKDRAS-----TLEKDKTVLVPLTNSLYVKGKLSDPEHVLVDVGTGFYVEKDTTS  
 ScPFD5 ECIDDIKTVS-----QAGNEGQKLLVPASASLYIPGKIVDNKKFMVDIGTGYYVEKSAEA  
 HsPFD5 DCLNVLNKS-----NEGKELLVPLTSSMYVPGKLHDVEHVLIDVGTGYYVEKTAED  
 EnPFD5 DCVRSINIEGVIGSAKKGTEGKDEILVPLTSSLYVKGRLTDREKVLVDVGTGYYVEKTAAK  
 :\* : : : . :\*\*\* : \*:\* : \*:: \* :::: \* :\*\*\*:\*\*\* :

CtPFD5 AAEFYEGKIKELATNIQGLEGIVQAKTANLRVVEEVLKQKVLASNAAGTGAKQSS-----  
 ScPFD5 AIAFYQKKVDKLNKESVQIQDIIKEKTQYSLSIEAQIRQAAIRQHEAMSKQQQQQKQKES  
 HsPFD5 AKDFFKRKIDFLTKQMEKIQPALQEKHAMKQAVMEMMSQKIQQLTALGAAQATAKA-----  
 EnPFD5 AIEFYEQKVKELETNLTELEKLVQTKSSQQLFEDALRQKLMSEGAASSAQAAG-----  
 \* \*:: \*:. \* .: :: :: \* . : \* :

CtPFD5 ----  
 ScPFD5 STA  
 HsPFD5 ----  
 EnPFD5 ----

CtPFD6 -MAEIQARLQALSEEF SKLQQDLQDALQSRQKLEAQKQENLGVQKEFKKLKEGENIYKLI  
 ScPFD6 -----MSELGAKYQQLQNELEEFIVARQKLETQLQENKIVNEEFDQLEEDTPVYKLT  
 HsPFD6 MAELIQKKLQGEVEKYQQLQKDL SKSMGRQKLEAQLTENNIVKEELALLDGSNVVFKLL  
 EnPFD6 -MADPQKQMQUALSDEYQALQTELDGLVDARQKLESQQQENKSVQAEFNSLDDDANIFKLI  
 :. :. \*\* :\* . : .\*\*\*\*\*:\* \*\* \* : \* : \* . . : : \*\*

CtPFD6 GPVLLKQDKVDAESIVNGRLDFIDKEINRIETLIKELQGKIEKKKGEIIQVQSGLQAAAV  
 ScPFD6 GNVLLPVEQSEARTNVDKRLEFIEITEITRCEKNIRDKQEELEKMRSELIKLNNTAASTGP  
 HsPFD6 GPVLVKQELGEARATVGKRLDYITAEIKRYESQLRDLERQSEQQRETLAQLQOEFORAQA  
 EnPFD6 GPVLLKQDKTEALMAVNGRLEFIEKEIQRIEGQIKENQDKSDKKRAEIVQYQSQIQQQAA  
 \* \*\* : : : \* \* . \*\* : : \* \*\* \* \* : : : : : : : : : .

CtPFD6 QAVKA-----  
 ScPFD6 GR-----  
 HsPFD6 AKAGAPGKA  
 EnPFD6 AAAASA---



**Supplementary Fig. S3 X-ray diffraction pattern from a crystal of CtPFD.**

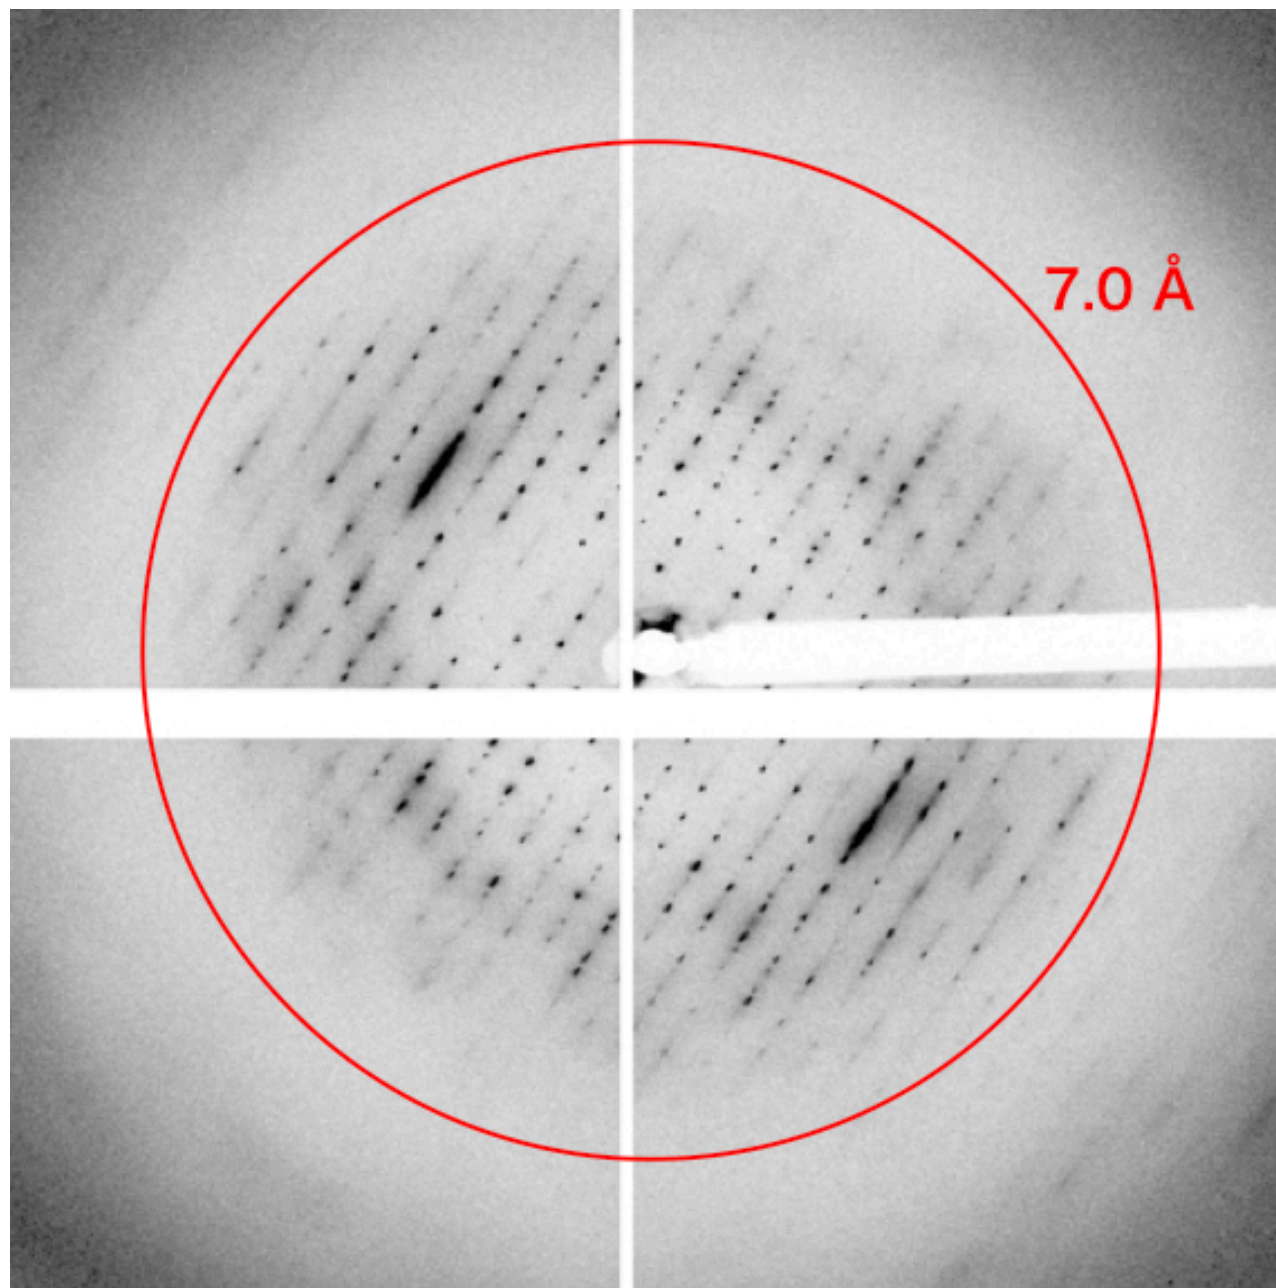

## Supplementary Table S1 Primers, vectors, host strains for expression of PFD subunits

### PFD1

Forward primer: GGAATTCCATATGTCCTAAGCACAGAGGCGC

Reverse primer: CGGGATCCATTATGACTGACCACCGCCCTT

Expression vector: pET-23b

Expression host: *E. coli*. BL21 star (DE3) pRARE

Complete amino-acid sequence of the construct produced:

MSLSTEALQKLVREIESQAIAAQQQISLVRTQIAAKQREMRLAQLTRSEISALPSDTDVYEGVGMFVAVPVPAMQDKLGE

QIKTLEGEVETMNRRLHYLETTAKNSQEHIKIKGGGQS

Molecular Mass: 13290.77 g/mol

### PFD2\_His

Forward primer: GGAATTCCATATGCACCACCACCACCACCACATCGAAGGGCGTGCGACACAGTCTGCAGC

Reverse primer: CGGGATCCTCATGACTGCACGACCTGAACG

Expression vector: pET-23b

Expression host: *E. coli*. BL21 star (DE3) pRARE

Complete amino-acid sequence of the construct produced:

MHHHHHHIEGRMATQSAAAKRQDDLQYTTYKNTLQQAQKIGDVEQEAEEHKLVLLETLEPLPGDRKCFRMINGVLVE

RTVQDVIPALRTNAEGLKKVLEDLVKQYKAKQDELEQWKKKNNVQVVQS

Molecular Mass: 14858.17 g/mol

### PFD3\_Strep

Forward primer: GGAATTCCATATGGCCAGTCAAGCAAAAGAAGC

Reverse primer: CTCGAGTTATTTTCAAACTGTGGATGCGACCAACGCCCTTCGATTGAGCTGACGTCCCAGTTGTACAC

Expression vector: pET-23b

Expression host: *E. coli*. Rosetta2 (DE3) pLysS

Complete amino-acid sequence of the construct produced:

MASQAKEAATKDATPSNPRGIPYAPFVDKVEDYVSSRDDVEPTLRRFQELIAKYQFMEQNLQRRVAGLKDKMPDIQKTLD

TVRFLKLRITSESDPIETTFELNDTLYAKAEIPPTDEVYLVWGANVMLAYPLDEAEQLLDSKLLKAAKQSLANCEEDLDFLRE

QITTEVAIARVYNWDVSSIEGRWSPQFEK

21918.95 g/mol

### PFD4

Forward primer: GGAATTCCATATGAACATAAGTCGGCGAATGGAG

Reverse primer: CGGGATCCTCATGTCTCGAGATTGATGGTCTTG

Expression vector: pET-23b

Expression host: *E. coli*. Rosetta2 (DE3) pLysS

Complete amino-acid sequence of the construct produced:

MNISRRMEEEEAIGEDVEVRREDQDKINRFSRLHGHELAIEEELKAKQKEKEELDDITTELELADEDELVPYKVGDAFFHIP

LPQAQEMLGISTAKLEEEISQLEEKLSNIRDEMSQLKVELYARFGKTINLET

Molecular Mass: 15515.05 g/mol

### PFD5

Forward primer: GGAATTCCATATGGCCAGCCGCGAGC

Reverse primer: CGGGATCCTCATGAAGATTGCTTTGCTCCCG

Expression vector: pET-23b

Expression host: *E. coli*. BL21 star (DE3) pRARE

Complete amino-acid sequence of the construct produced:

MASRSGQDKQGGEAVDLASLSVQQLSTVKKQLDGEVEHLSTSYAQLVAAQGFKECLRIVKDRASTLEKDKTVLVPLT

NSLYVKGKLSDEPHVLVDVGTGFYVEKDTTSAAEFYEGKIKELATNIQGLEGIVQAKTANLRVVEEVLVLRQKVLASNAAGT

GAKQSS

Molecular Mass: 17591.16 g/mol

### PFD6

Forward primer: GGAATTCCATATGGCTGAAATCCAGGCC

Reverse primer: CGGGATCCTCATGCCTTGACGGCTTGAAC

Cloning vector: pET-23b

Expression vector: pET-23b

Expression host: *E. coli*. BL21 star (DE3) pRARE

Complete amino-acid sequence of the construct produced:

MAEIQARLQALSEEFSKLLQDLQDALQSRQKLEAQKQENLGVQKEFKLKEGENIYKLIQVLLKQDKVDAESIVNGRLD

FIDKEINRIETLIKELQKIEKKKGEIIVQVQSGLQAAAQVAVKA

Molecular Mass: 13879.64 g/mol
